# Supplementary material for: Technical note: Including non-evaporative fluxes enhances the accuracy of isotope-based soil evaporation estimates
Source: Copernicus journal article supplement (doi:10.5194/egusphere-2025-4614), 2025-10-20
Supplement: Supplementary file [file egusphere-2025-4614-AC1-supplement.pdf]

Reviewer comments are highlighted in boldface and italic. Our responses are in dark blue, while light blue texts are the revisions going to be made.

**2. Figure 3: Please make the font larger. Additionally, the color contrast between model results and observations could be enhanced for clarity.**

Thank you for your comments. The font of Figure 3 has been enlarged.

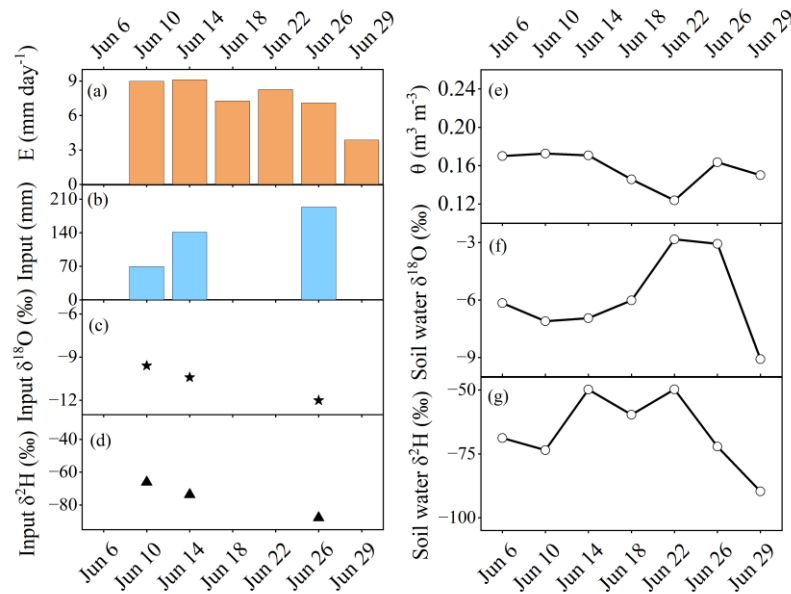

Figure 3. Measured evaporation (panel a), input water (precipitation + irrigation, panel b) and isotope signals (panels c and d), soil water contents (panel e, top 25 cm) and isotopic signals (panels f and g) from June 6 to June 29. Note that June 6 is the initial date.

Additionally, to enhance the clarity of Figure 6, colors have been revised:

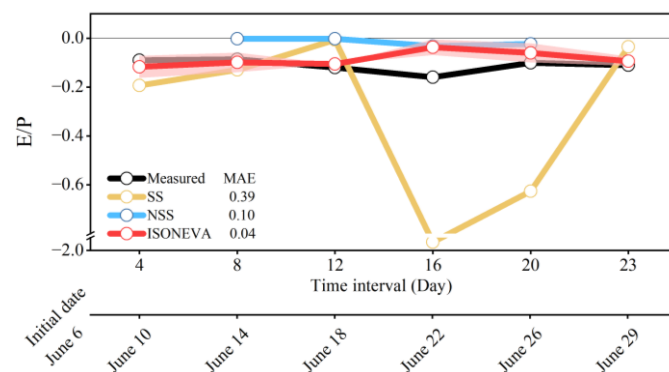

Figure 6. Estimated and measured E/P ratios from lysimeter data under different

temporal intervals. The shaded pink area represents the uncertainty of ISONEVA estimates. The date is shown on the lower x-axis. The light grey line is the horizontal line at  $E/P$  is 0.

**4. Appendix A: The derivation of ISONEVA are pure equations. Adding explanations would be helpful for readers to understand.**

Thank you for your comments. To help readers follow the derivation, we briefly summarize each step in Appendix A.

NSS section (A1 - A9): “Equation A1 expresses the water balance of the topsoil control volume under evaporation-only conditions, where the change in soil water storage ( $\frac{\partial V}{\partial t}$ ) is equal to the evaporation flux  $E$ .

Equation A2 represents the corresponding isotope mass balance, where  $VR$  is the total mass of isotopes in the control volume and  $ER_E$  is the isotopic flux associated with evaporation.

By applying the chain rule, Equation A3 relates the change in soil isotopic ratio ( $\frac{\partial R}{\partial t}$ ) to the water balance ( $\frac{\partial V}{\partial t}$ ) and isotope balance ( $\frac{\partial(VR)}{\partial t}$ ).

Rearranging terms yields Equation (A4), which describes the time evolution of soil isotopic composition as a function of the evaporation rate and the isotopic compositions of soil water and evaporated vapor.

Equation A5 rewrites  $v \frac{\partial R}{\partial t}$  in relation to  $\frac{\partial(\ln f)}{\partial t}$ , where  $f$  is the ratio of final to initial soil water storage. Then, Equation A6 shows  $R$  as a function of  $\ln f$ , combining the water-storage change with isotopic enrichment processes.

Solving this first-order linear differential equation leads to Equation A7, which provides the analytical solution for the evolution of  $R$ .

Equations A8-A9 present the general solution to a linear differential equation of the form  $\frac{\partial y}{\partial x} + p(x)y = q(x)$ , which is used to derive Equation A7 from Equation A6.”

ISONEVA section (A10 - A17): “Equation A10 represents the water mass balance of

the topsoil control volume, where changes in soil water storage ( $\frac{\partial V}{\partial t}$ ) are determined by precipitation ( $P$ ), evaporation ( $E$ ), and percolation ( $Q$ ).

Equation A11 describes the corresponding isotope mass balance, where  $VR$  is the total mass of isotopes stored in the control volume. The terms on the right-hand side represent isotopic inputs from precipitation ( $PR_p$ ), isotopic enrichment during evaporation ( $ER_E$ ), and isotopic losses through percolation ( $QR$ ).

To obtain an equation for the evolution of soil water isotopic composition ( $R$ ), Equations A10 and A11 are combined, this leads to Equations A12-A14, which express the temporal evolution of  $R$  in terms of water fluxes and their isotopic compositions.

Like NSS derivations, Equation A14 is rewritten in terms of the derivative of  $R$  with respect to  $\ln(f)$ , this transformation yields Equation A15.

Finally, Equation A15 can be further simplified to A16, which is a first-order linear differential equation. It can be solved analytically using A9 and results in A17, which is the basis of the ISONEVA estimation.”
